# Supplementary material
Source: Springer Nature journal article supplement (https://rdp.sfb1565.uni-goettingen.de/archive/5/56/09f59f7ba8cc31cb/download)
Supplement: MOESM1 [file 41467_2026_72355_MOESM1_ESM.pdf › 41467_2026_72355_MOESM1_ESM.pdf]

## SUPPLEMENTARY INFORMATION

### 2'-O-methylation-dependent installation of *N*<sup>2</sup>-methylguanosine in the U6 internal stem loop facilitates efficient spliceosome assembly

Nicole Kleiber, Jonny Petrosyan, Maria Greve, Chairini C. Thomé, Olexandr Dybkov, Laurianne L.E. Tay, Luisa M. Welp, Philipp Hackert, Holger Stark, Markus T. Bohnsack, Henning Urlaub, Lydia Herzelt, Marc Graille, Claudia Höbartner, Katherine E. Bohnsack

## SUPPLEMENTARY TEXT

### Verification of synthesized RNAs

The purity of the synthesized RNA samples was analyzed by anion-exchange HPLC (Dionex DNAPac PA200, 2 × 250 mm, flow rate 0.5 mL/min, at 60 °C; Solvent A: 25 mM Tris-HCl (pH 8.0), 6 M Urea. Solvent B: 25 mM Tris-HCl (pH 8.0), 6 M Urea, 0.5 M NaClO<sub>4</sub>. Gradient: 0-48% solvent B in 12 CV). The resulting anion exchange HPLC-traces (260 nm) are shown below.

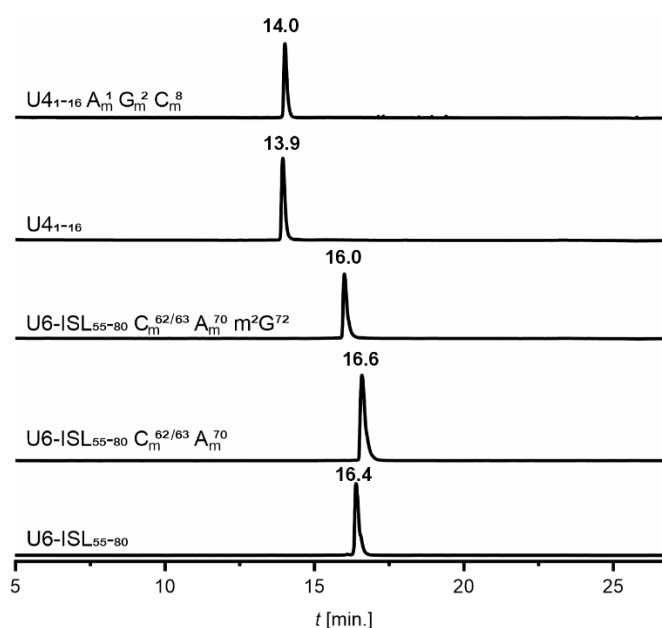

To confirm the identity of all synthesized RNA samples, HR-ESI-MS analysis on a Bruker microOTOF-Q-III (negative ion mode, direct injection) was performed. The monoisotopic masses were obtained by charge deconvolution. The results are reported below.

| Oligonucleotide                                                                             | Sum Formula                                                                         | Mass<br>calculated [Da] | Mass found<br>[Da] |
|---------------------------------------------------------------------------------------------|-------------------------------------------------------------------------------------|-------------------------|--------------------|
| U6-ISL <sub>55-80</sub>                                                                     | C <sub>248</sub> H <sub>310</sub> N <sub>103</sub> O <sub>177</sub> P <sub>25</sub> | 8336.18686              | 8336.21252         |
| U6-ISL <sub>55-80</sub> Cm <sub>62/63</sub> Am <sub>70</sub>                                | C <sub>251</sub> H <sub>316</sub> N <sub>103</sub> O <sub>177</sub> P <sub>25</sub> | 8378.23381              | 8378.25405         |
| U6-ISL <sub>55-80</sub> Cm <sub>62/63</sub> Am <sub>70</sub> m <sup>2</sup> G <sub>72</sub> | C <sub>252</sub> H <sub>318</sub> N <sub>103</sub> O <sub>177</sub> P <sub>25</sub> | 8392.24946              | 8392.24627         |
| U4 <sub>1-16</sub>                                                                          | C <sub>152</sub> H <sub>190</sub> N <sub>61</sub> O <sub>111</sub> P <sub>15</sub>  | 5109.76177              | 5109.73947         |
| U4 <sub>1-16</sub> Am <sup>1</sup> Gm <sup>2</sup> Cm <sup>8</sup>                          | C <sub>155</sub> H <sub>196</sub> N <sub>61</sub> O <sub>111</sub> P <sub>15</sub>  | 5151.76372              | 5151.79028         |

### Establishment of methylation-sensitive DNazymes

To label unmodified and modified U6-ISLs with fluorescein on the 3'-end, periodate oxidation was used. The reaction was performed in a total volume of 48  $\mu$ L. RNA (5 nmol), sodium phosphate buffer (pH 7.5, 50 mM) and NaIO<sub>4</sub> (20 mM) were incubated for 10 min at 37 °C. After addition of Na<sub>2</sub>SO<sub>3</sub> (83 mM), the mixture was incubated for another 5 min at 37 °C. Following addition of Flu-TSC (8 mM), the final mixture was incubated for 2 h at 37 °C. Stop solution was added and the labeled RNA was purified via a 15% PAA gel. After ethanol precipitation, the labeled RNA was used for DNazyme cleavage kinetic assays.

For DNazyme cleavage kinetic assays, 10 pmol of 3'-fluorescein labeled unmodified and modified U6-ISL was annealed to 100 pmol of DNazyme (m<sup>2</sup>G, Am<sub>70</sub> or Cm<sub>62</sub>/Cm<sub>63</sub>) in reaction buffer (m<sup>2</sup>G and Am<sub>70</sub>: 50 mM HEPES (pH 7.4), 400 mM KCl, 100 mM NaCl; Cm<sub>62</sub>/Cm<sub>63</sub>: 50 mM HEPES (pH 7.4), 150 mM NaCl). The reaction was initiated by addition of 5 mM MgCl<sub>2</sub> (m<sup>2</sup>G), 10 mM MgCl<sub>2</sub> and 10 mM MnCl<sub>2</sub> (Am<sub>70</sub>) or 1 mM MgCl<sub>2</sub> and 1 mM MnCl<sub>2</sub> (Cm<sub>62</sub>/Cm<sub>63</sub>). After incubation at 25 °C, 1  $\mu$ L aliquots were quenched at the desired timepoints in 4  $\mu$ L of stop solution. Subsequently, half of the reaction mixture was loaded on a 20% PAA gel. After running the gel for 1 h at 25 W, band intensities were visualized and analyzed *via* fluorescence imaging using a ChemiDOCMP with blue epi illumination and an 530/28 nm emission filter. All DNazyme cleavage kinetic assays were performed in triplicates. To obtain  $k_{obs}$  the mean value of the cleaved fraction (%) for each time point were plotted against the respective incubation time and fitted according to the equation below where  $P_{max}$  = final yield using OriginPro2023b.

$$y = P_{max} * (1 - \exp(-k_{obs} * t))$$

The cleavage site for the Cm<sub>62</sub>/Cm<sub>63</sub> DNazyme was confirmed *via* HR-ESI-MS. The sum formula, calculated and found masses of the U6-ISL fragments after incubation with the Cm<sub>62</sub>/Cm<sub>63</sub> DNazyme for 4 h at 25 °C are shown below.

| Oligonucleotide | Sum Formula                                                                        | Mass calculated [Da] | Mass found [Da] |
|-----------------|------------------------------------------------------------------------------------|----------------------|-----------------|
| 3'-fragment     | C <sub>164</sub> H <sub>203</sub> N <sub>71</sub> O <sub>114</sub> P <sub>16</sub> | 5485.80774           | 5485.89581      |
| 5'-fragment     | C <sub>84</sub> H <sub>107</sub> N <sub>32</sub> O <sub>63</sub> P <sub>9</sub>    | 2850.37967           | 2850.43181      |

## SUPPLEMENTARY FIGURES AND LEGENDS

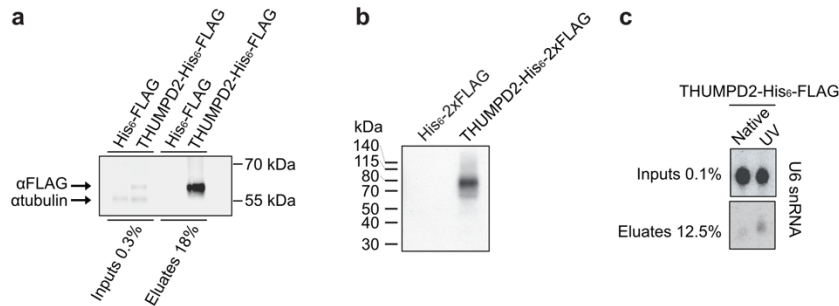

**Supplementary Figure S1. Immunoprecipitation of THUMP2-His<sub>6</sub>-2xFLAG and protein–RNA crosslinking (a-b)** HEK293 over-expressing His<sub>6</sub>-2xFLAG or THUMP2-His<sub>6</sub>-2xFLAG were UV-crosslinked and used in n=2 anti-FLAG immunoprecipitation experiments. The FLAG-tagged versions of the proteins were detected by western blotting with an anti-FLAG antibody and tubulin was used as a loading control (a). After partial RNase digestion, the 5' end of recovered RNA fragments were 5'-labelled with [<sup>32</sup>P] and adaptors were ligated to the 5' and 3' ends. Protein–RNA complexes were separated by denaturing PAGE, transferred to a nylon membrane and detected by autoradiography (b). **(c)** Extracts from cells expressing THUMP2-His<sub>6</sub>-2xFLAG that had been crosslinked (UV) or not (Native) were used for anti-FLAG immunoprecipitation experiments (n=1). RNA was eluted from beads by Proteinase K treatment and RNAs in input and eluate samples were separated by denaturing PAGE and U6 snRNA was detected by northern blotting. Note the increased recovery of U6 after crosslinking and the upwards shift of the U6 signal, demonstrating successful protein–RNA crosslinking.



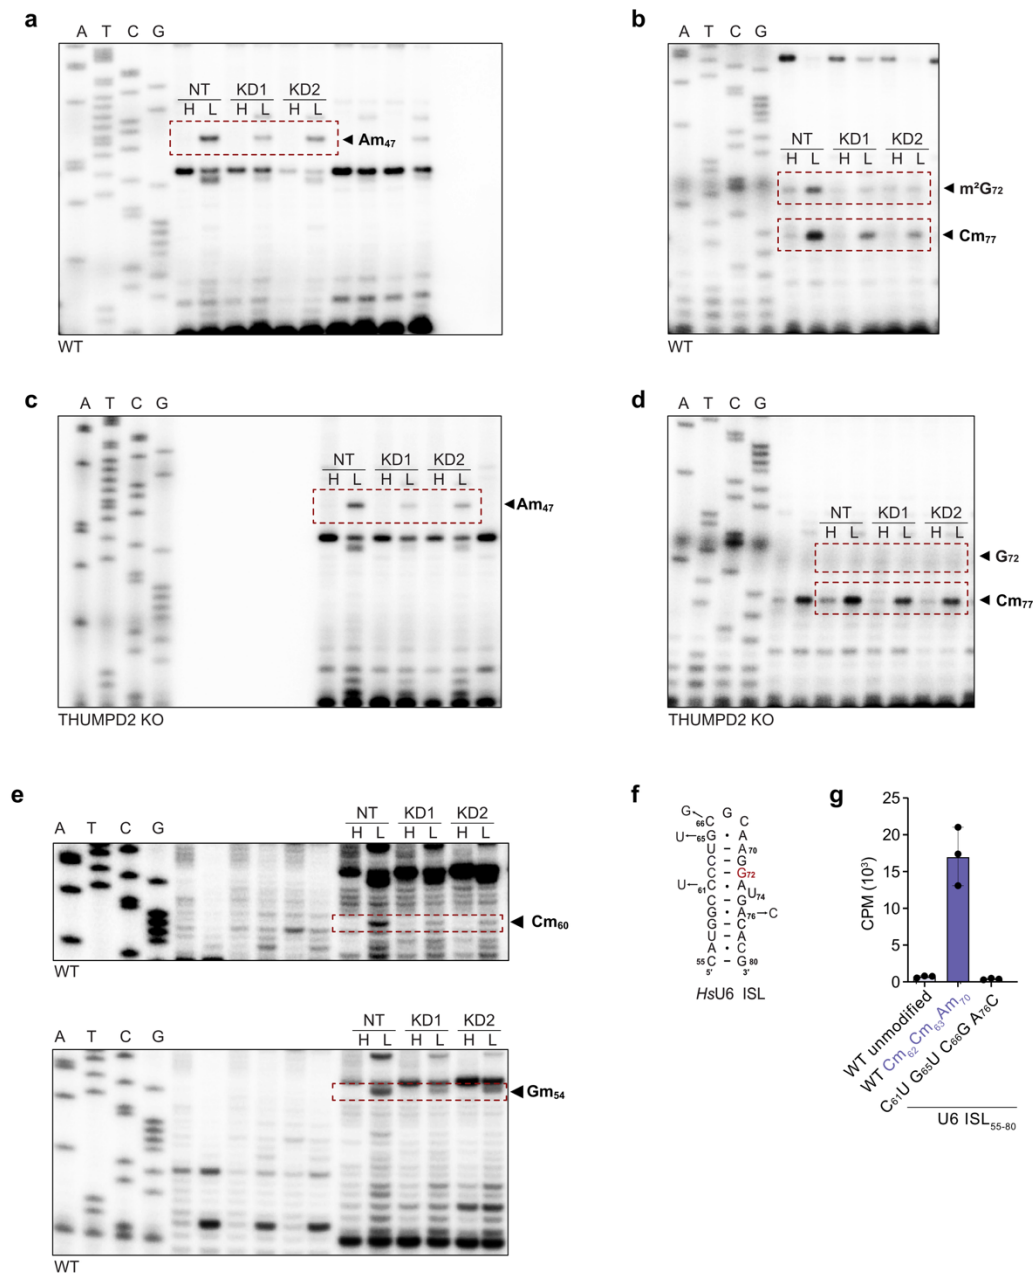

**Supplementary Figure S3. LARP7-dependence of 2'-O-methylations in U6 determined by primer extensions and effect of U6 ISL stem stability on THUMPDP2 methylation. (a-d)** Uncropped primer extension gels represented in Fig 4h for RNA extracted from HCT116 WT (a, b) and THUMPDP2 KO cells (c, d) after treatment with a non-target siRNA (NT) or siRNAs against LARP7 (KD1 and KD2). H = high dNTP concentration and L = low dNTP concentration. Red boxes highlight the cDNA fragments corresponding to the  $\text{m}^2\text{G}_{72}$  modification (b) and the fragments indicative of the presence of  $\text{Cm}_{77}$  (b,d) or  $\text{Am}_{47}$  (a,c). A sequencing ladder was run alongside each set of samples and A, T, C, G indicate ladders prepared using termination mixes containing ddATP, ddTTP, ddCTP and ddGTP, respectively.

Representative images for n=3 experiments. **(e)** RNA from siRNA-treated HCT116 WT cells was used for primer extension assays, as in (a-d) to detect Cm<sub>60</sub> (top) and Gm<sub>54</sub> (bottom). Representative image for n=2 experiments. **(f)** Schematic view of the human U6 ISL in which four sub-optimal base-pairs closest to G<sub>72</sub> were strengthened by nucleotide substitutions (C<sub>61</sub>U, G<sub>65</sub>U, C<sub>66</sub>G and A<sub>76</sub>C). **(g)** *In vitro* methylation assays were performed using purified His<sub>6</sub>-ZZ-BtTHUMPD2-BtTRMT112 protein complex, [<sup>3</sup>H]-SAM as methyl group donor and the different RNA substrates, including WT unmodified and 2'-O-methylated U6 ISLs and the mutated ISL depicted in (f). Tritium incorporated in the substrate RNAs was quantified and bar plots show averaged counts per minute (CPM) of n=3 independent experiments with error bars representing mean ± standard deviation.

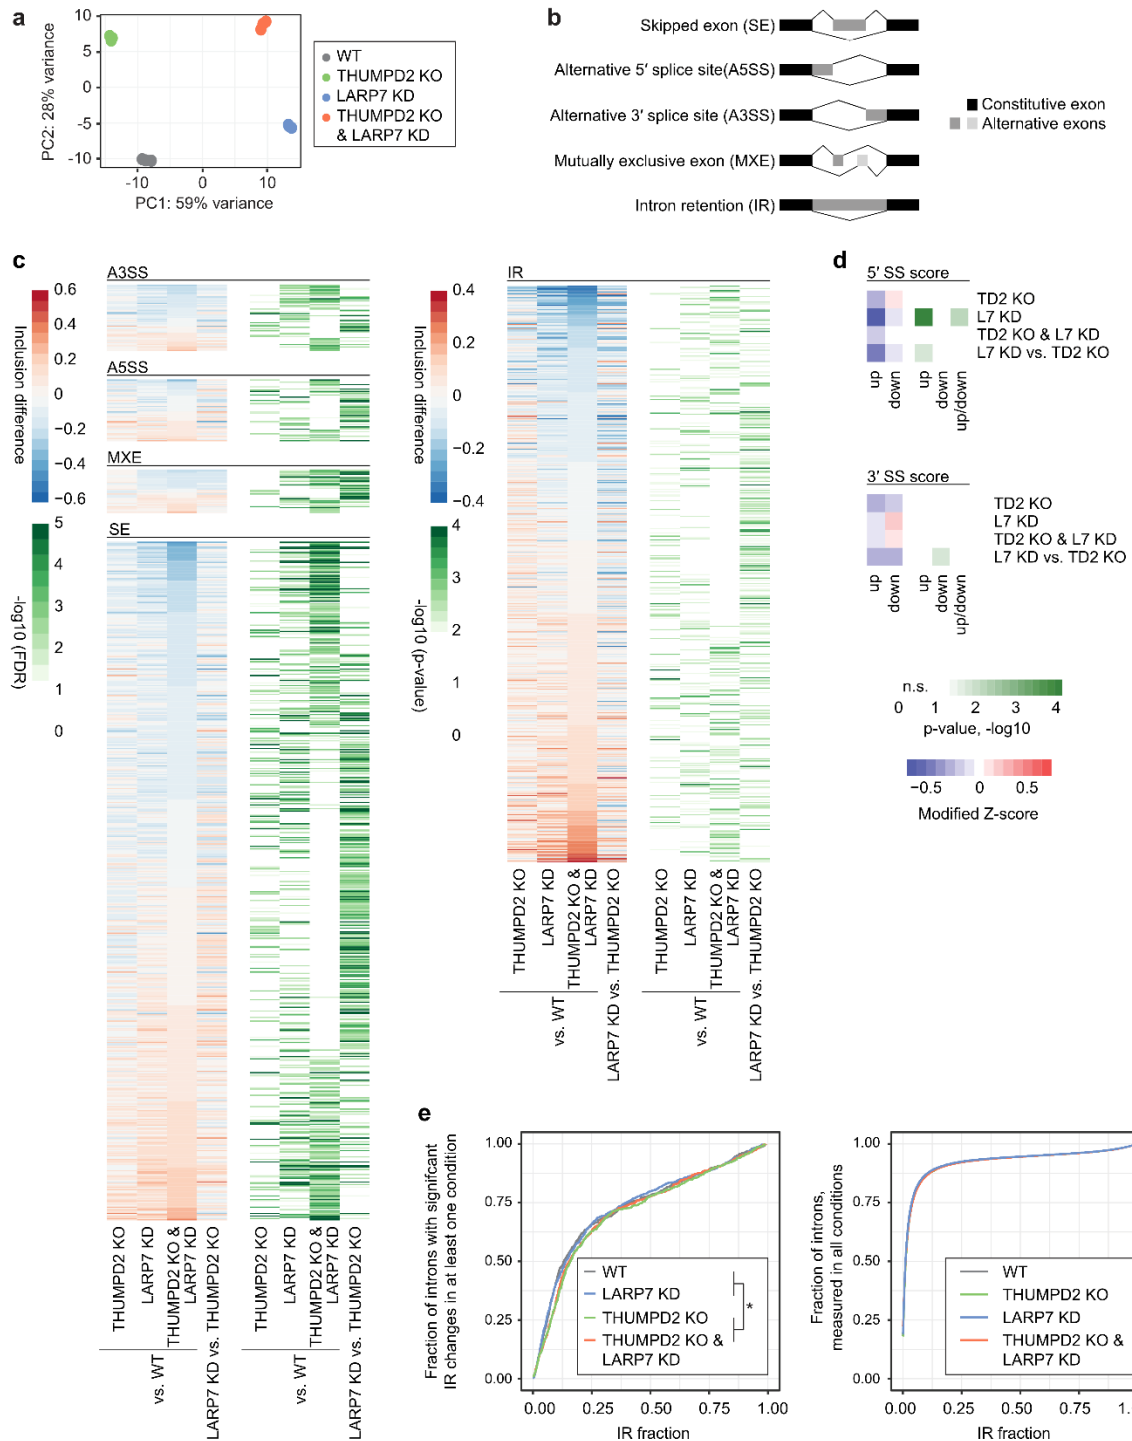

**Supplementary Figure S4: Characterization of RNA-seq datasets by principal component analysis and individual alternative splicing events.** (a) Principal component analysis based on gene-level expression quantification (top 5000 genes). The three biological replicates are shown as individual dots of the same color, and display good reproducibility. (b) Scheme of different types of alternative splicing. (c) Heatmap representation of alternative splicing events by AS type and sampled condition. Events are shown that change significantly in at least one of the 4 comparisons. Comparisons are made with respect to WT or between



LARP7 KD and THUMPD2 KO (right-most column). Significant AS events (rows) are sorted by increasing inclusion difference in the combined condition. Significant A3SS, A5SS, MXE and SE events are derived from rMATS (FDR < 0.01, absolute inclusion difference > 0.1, median read count in at least one condition > 50). Significant IR events are based on splicing efficiency calculation of annotated introns (p-value < 0.01, absolute inclusion difference > 0.05, median read count in at least one condition > 50). **(d)** Heatmaps showing the change of the median 5'/3' splice site strength in more (up) or less (down) retained introns in the samples indicated. The modified Z-score relative to introns without significant changes and the significance of the changes plotted as  $-\log_{10}(\text{p-value})$  from the Wilcoxon rank-sum test are plotted. LARP7 KD = L7 KD, THUMPD2 KO = TD2 KO. **(e)** Cumulative IR fraction distribution of introns that change pre-mRNA splicing significantly in at least one of the 4 comparisons (left) and of all introns passing the read count cutoff (right). p values of comparisons summarized with \* were derived with the two-sided Kolmogorov-Smirnov with multiple testing correction using the Bonferroni method. WT against THUMPD2 KO 0.009792; WT against LARP7 KD & THUMPD2 KO 0.025404; LARP7 KD against THUMPD2 KO 0.021108; LARP7 KD against LARP7 KD & THUMPD2 KO 0.043554, and 1 for WT against LARP7 KD and THUMPD2 KO against LARP7 KD & THUMPD2 KO, respectively.

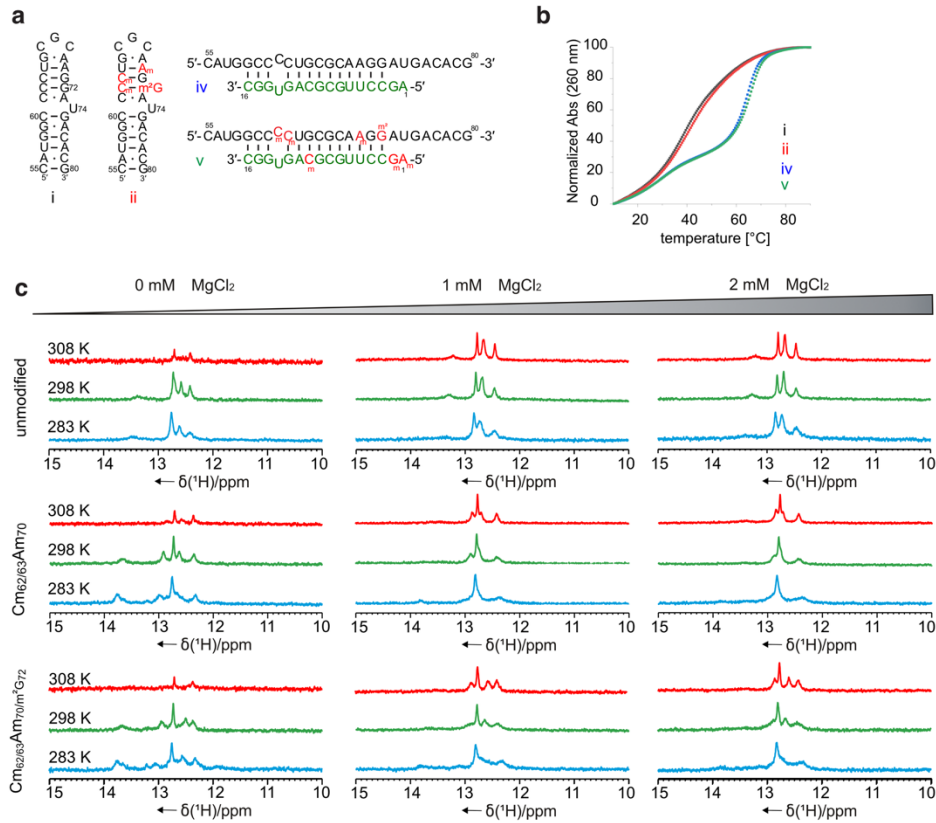

**Supplementary Figure S5. Analyses of U4/U6 partial duplex and U6 ISL stability and structure *in vitro*, and snRNA levels in wild-type and THUMPD2 KO cells. (a)** Schematic view of the synthetic RNA samples used for biophysical investigations. Modified nucleotides are shown in red. The U6 ISLs (i and ii) are as in Fig. 6a and within the modified and unmodified U4/U6 partial duplexes (iv and v), U6 is shown in black and U4 in green. **(b)** UV thermal melting curves for the samples shown in (a) plotting hyperchromicity at 260 nm. Conditions: 1  $\mu$ M RNA, 100 mM NaCl, 10 mM potassium phosphate buffer pH 7.4, T = 10  $^{\circ}$ C – 90  $^{\circ}$ C. One of n=4 reversible heating and cooling curves is shown. **(c)** 1D  $^1$ H-NMR spectra of imino region, 120  $\mu$ M RNA in 10 mM phosphate buffer pH 7.4, 90% H<sub>2</sub>O/ 10% D<sub>2</sub>O at 283 K, 298 K or 308 K in the presence of 0, 1 or 2 mM MgCl<sub>2</sub>.

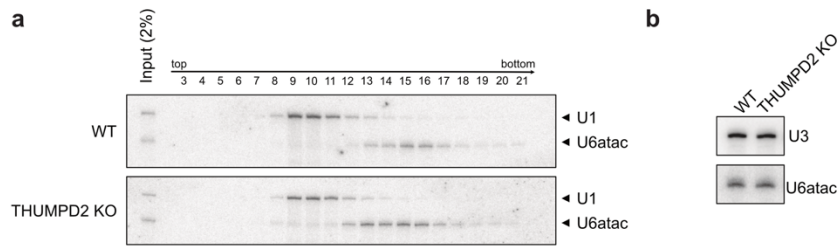

**Supplementary Figure S6. Effect of THUMPD2 KO on U6atac levels and assembly into snRNPs.** **(a)** Sedimentation of snRNP particles from HCT116 WT and THUMPD2 KO cells in a 10-30% glycerol gradient was analyzed by northern blotting using probes against U1 and U6atac. Representative data from n=3 experiments is shown. **(b)** Northern blot analysis of the levels of U6atac compared to the U3 snoRNA (loading control) in nuclear extracts from wild-type (WT) and THUMPD2 KO cells. Representative data from n=3 experiments is shown.

**a**

|                        | Type of modification          | Modification symbol and position   | Enzyme or enzyme/guide RNA(s)         | Source (PMID)                                                                           |
|------------------------|-------------------------------|------------------------------------|---------------------------------------|-----------------------------------------------------------------------------------------|
| Terminal modifications | 5' Capping                    | 5' $\gamma$ -monomethyl            | MEPCE                                 | 8175647; 17643375                                                                       |
|                        | 3' End extension and trimming | 3' terminal 2',3'-cyclic phosphate | TUT1 and USB1                         | TUT1 (U6 TUTase): 9628908; 16790842. USB1 (Mpn1): 8995392; 22899009; 23022480; 23190533 |
| Internal modifications | Pseudouridylations            | $\Psi$ 31                          | Dyskerin / SNORA79 (ACA65)            | SNORA79 (ACA65): 16373490                                                               |
|                        |                               | $\Psi$ 40                          | Dyskerin / SCARNA23/3(ACA12)          | SCARNA23 (ACA12): 15199136 and SCARNA3 (HBI-100): 11387227                              |
|                        |                               | $\Psi$ 86                          | Dyskerin / SNORA79 (ACA65)            | SNORA79 (ACA65): 16373490                                                               |
|                        | 2'-O-methylations             | Am47                               | Fibrillarin / SNORD7                  | SNORD7 (mgU6-47): 9844635                                                               |
|                        |                               | Am53                               | Fibrillarin / SNORD8/SNORD9           | SNORD8/9 (mgU6-53): 10490628                                                            |
|                        |                               | Gm54                               | Fibrillarin / ?                       | -                                                                                       |
|                        |                               | Cm60                               | Fibrillarin / SNORD67                 | SNORD67 (HBI-166): 11387227; 40316533                                                   |
|                        |                               | Cm62                               | Fibrillarin / SNORD94                 | SNORD94 (U94-U106): 14602913                                                            |
|                        |                               | Cm63                               | Fibrillarin / ? (possibly SNORD88A/B) | SNORD88A/B: 37792516                                                                    |
|                        |                               | Am70                               | Fibrillarin / ? (possibly SNORD23)    | SNORD23: 40001124                                                                       |
|                        |                               | Cm77                               | Fibrillarin / SNORD10                 | SNORD10 (mgU6-77): 9844635                                                              |
|                        | Base methylations             | m <sup>6</sup> A <sub>43</sub>     | METTL16                               | 28525753; 29051200                                                                      |
|                        |                               | m <sup>2</sup> G <sub>72</sub>     | THUMP2                                | 37283053; 38165050; this study                                                          |

**b**

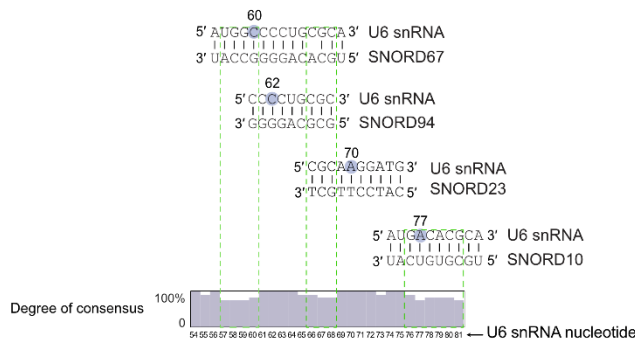

**Supplementary Figure S7. U6 snRNA modifications and snoRNA base-pairings within the U6 ISL. (a)** Summary of the mapped U6 snRNA terminal (5' and 3') and internal modifications (pseudouridylations, 2'-O-methylations and base methylations). Enzymes catalyzing the indicated modifications are listed on the right and where applicable guide RNAs are indicated. Source publications (PMID) are indicated on the right. **(b)** Base-pairings between the U6 ISL and box C/D snoRNAs guiding the 2'-O-methylation of C<sub>60</sub>, C<sub>62</sub>, A<sub>70</sub> and A<sub>77</sub> are shown. 2'-O-methylated nucleotides are highlighted and the position in the U6 sequence is indicated. Regions boxed in a dashed green line correspond to those with lower conservation scores as indicated in the bar plot representing the degree of consensus (0 = no conservation; 100% = maximum percentage identity) from Fig. 4k.
